# Supplementary material for: Atmospheric chemistry and physics in the atmosphere of a developed megacity (London): an overview of the REPARTEE experiment and its conclusions
Source: Copernicus journal article supplement (doi:10.5194/acp-12-3065-2012), 2012-03-30
Supplement: Supplementary file 1 [file acp-12-3065-2012-supplement.pdf]

## **SUPPLEMENTARY INFORMATION**

### **Atmospheric chemistry and physics in the atmosphere of a developed megacity (London): An overview of the REPARTEE experiment and its conclusions**

**Roy M. Harrison, M. Dall'Osto, D.C.S. Beddows, A.J. Thorpe, W.J. Bloss, J.D. Allan, H. Coe, J.R. Dorsey, M. Gallagher, C. Martin, J. Whitehead, P.I. Williams, R.L. Jones, J.M. Langridge, A.K. Benton, S.M. Ball, B. Langford, C.N. Hewitt, B. Davison, D. Martin, K. Petersson, S.J. Henshaw, I.R. White, D.E. Shallcross, J.F. Barlow, T. Dunbar, F. Davies, E. Nemitz, G.J. Phillips, C. Helfter, C.F. Di Marco, S. Smith**

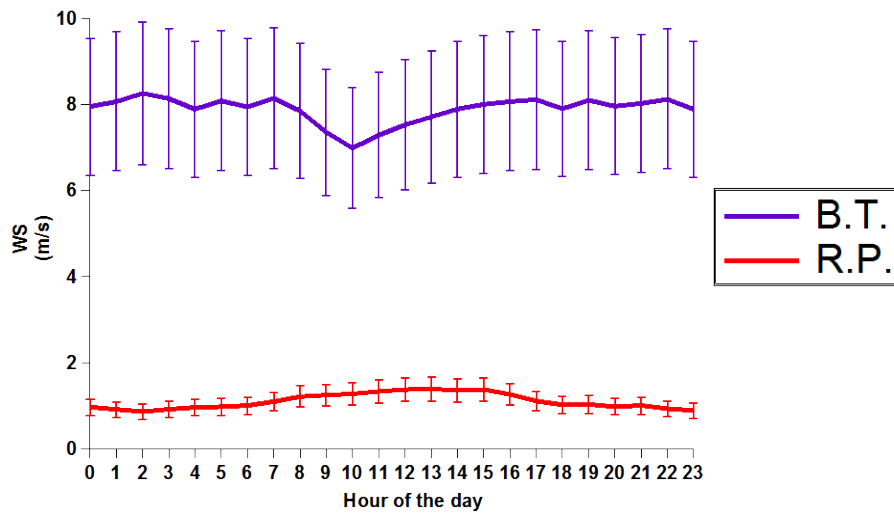

Figure S1: Diurnal average windspeeds at the R. Park and BT Tower sites in REPARTEE I

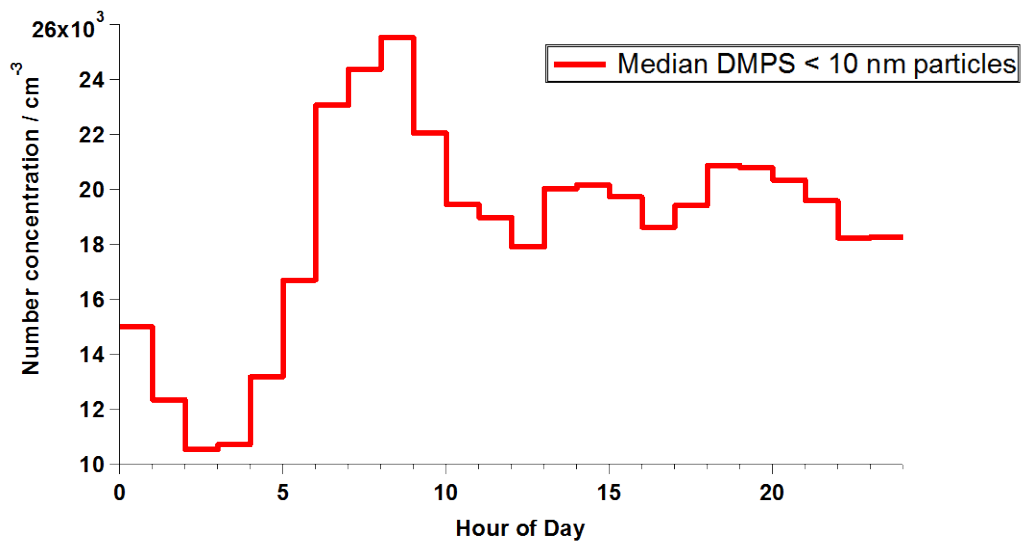

Figure S2: Median diurnal pattern of < 10 nm particles at the R. Park site for REPARTEE I

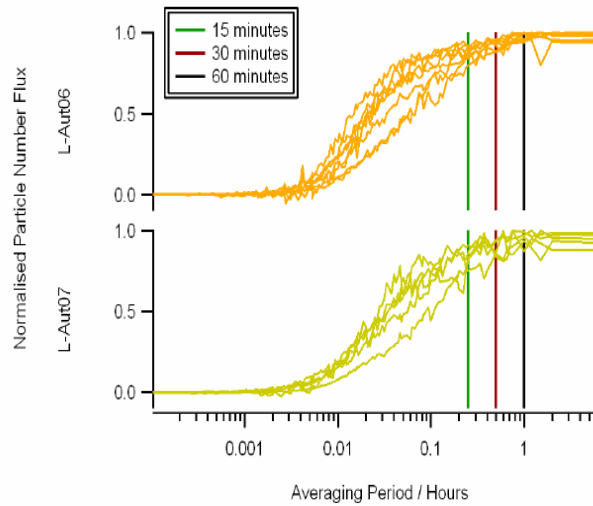

Figure S3: Normalised particle number flux as a function of flux averaging period for both REPARTEE experiments on the BT Tower (London Autumn 2006 and London Autumn 2007). The value of these Ogives at the averaging times of 15, 30 and 60 minutes (green, red and black line, respectively), reflects the fraction of the total flux that would be captured if these averaging times were used

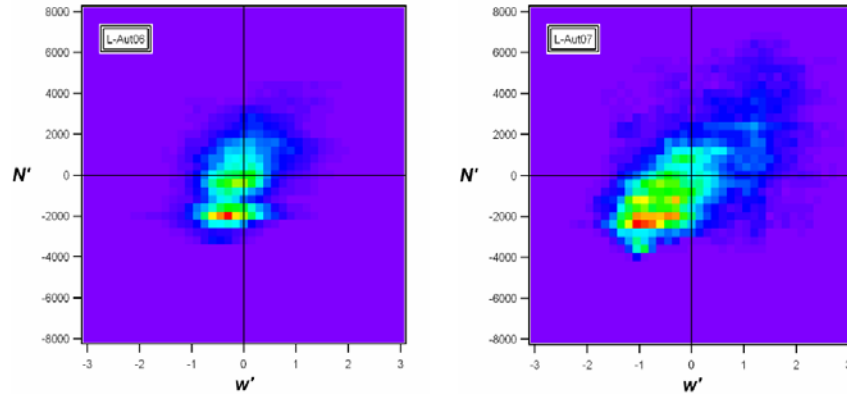

Figure S4: Two-dimensional normalized quadrant analyses for particle number fluxes during the two REPARTEE experiments (left to right: Autumn 2006 and Autumn 2007). Red areas indicate the highest frequency of occurrences whereas the purple areas indicate little or no events. Each plot is averaged over one hour and is typical of peak flux periods during weekday afternoons
